# Supplementary material
Source: Springer Nature journal article supplement (https://www.springermedizin.de/resource/supplementary/12950_2009_135_MOESM7_ESM.pdf/9558034)

## Cytokine release in plasma 60 min after LPS injection

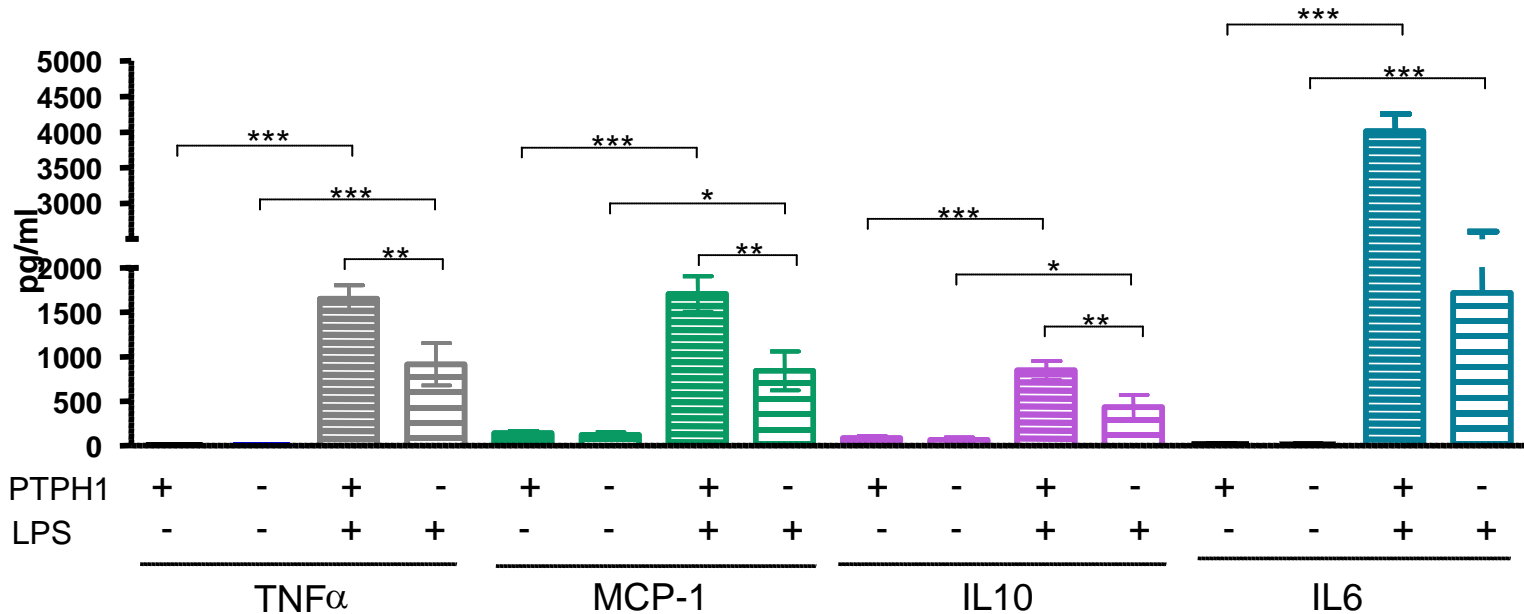

Supplement: MOESM7 [file 9558034]
